# Supplementary material
Source: publisher site journal article supplement (https://www.jstage.jst.go.jp/article/geochemj/49/5/49_2.0378/_supplement/_download/49_2.0378_1.pdf)
Supplement: Supplementary file 1 [file 49_2.0378_1.pdf]

## Supplementary Materials

Fig. S1. Photomicrographs (A-D) and SEM backscatter electron image (E) of the dolomitic limestones.

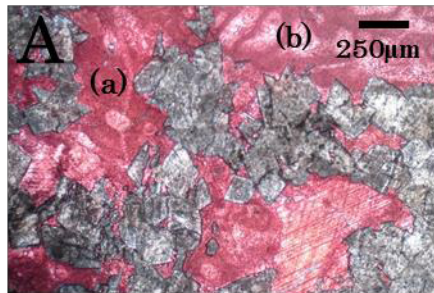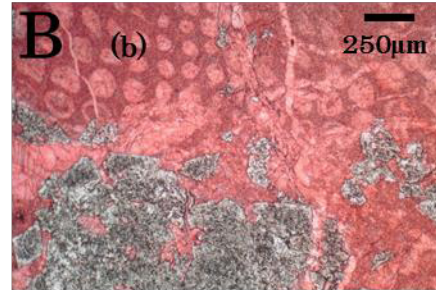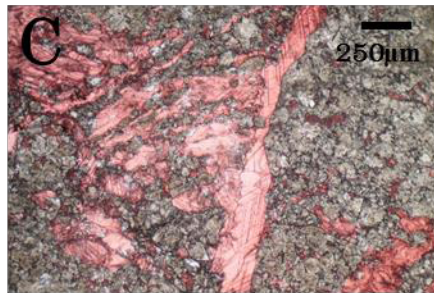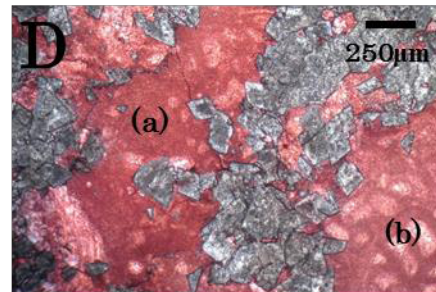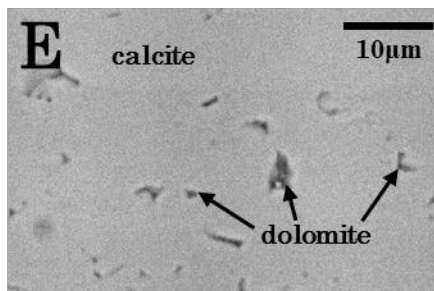

A and E: SO-1, B: FB-1, C: KZ-1, D: KZ-2  
A-D: stained by Alizarin red  
Red: calcite, Gray: dolomite  
(a): lime-mud, (b): fossil  
E: dolomite disseminated in calcite

Table S1. Major and trace element concentrations obtained from dolomitic limestone samples.

|                                   | SO-1                                |          | FB-1                             |          | KZ-1                                 |          | KZ-2                                 |          |
|-----------------------------------|-------------------------------------|----------|----------------------------------|----------|--------------------------------------|----------|--------------------------------------|----------|
| Locality                          | Shiori<br>(Shiga prefecture, Japan) |          | Iodo<br>(Gifu prefecture, Japan) |          | Kuzuu<br>(Tochigi prefecture, Japan) |          | Kuzuu<br>(Tochigi prefecture, Japan) |          |
| Formation                         |                                     |          | Funabuseyama formation           |          | Nabeyama formation                   |          | Nabeyama formation                   |          |
| Reference                         |                                     |          | Sano (1988)                      |          | Minoura (1992)                       |          | Minoura (1992)                       |          |
| Age                               | Permian                             |          | Permian                          |          | Permian                              |          | Permian                              |          |
| Dolomite content (%) <sup>*</sup> | 10                                  |          | 33                               |          | 54                                   |          | 46                                   |          |
| HCl residue (%)                   | 0.35                                |          | 0.15                             |          | 2.3                                  |          | 0.3                                  |          |
| Treatment                         | 0.5M-AcA                            | 0.5M-HCl | 0.5M-AcA                         | 0.5M-HCl | 0.5M-AcA                             | 0.5M-HCl | 0.5M-AcA                             | 0.5M-HCl |
| ppm in solution                   |                                     |          |                                  |          |                                      |          |                                      |          |
| Ca                                | 4000                                | 1240     | 2035                             | 1389     | 2279                                 | 2368     | 2639                                 | 2418     |
| Mg                                | 28                                  | 635      | 38                               | 717      | 124                                  | 1241     | 109                                  | 1223     |
| Ca/Mg (mol/mol)                   | 87.9                                | 1.18     | 32.5                             | 1.17     | 11.1                                 | 1.16     | 14.7                                 | 1.20     |
| ppm in solid <sup>**</sup>        |                                     |          |                                  |          |                                      |          |                                      |          |
| Mn                                | 23                                  | 69       | 4                                | 16       | 19                                   | 23       | 26                                   | 37       |
| Fe                                | 84                                  | 1662     | B.D.                             | 117      | 44                                   | 181      | 79                                   | 403      |
| Al                                | 72                                  | 128      | 80                               | 142      | 74                                   | 97       | 67                                   | 85       |
| P                                 | B.D.                                | 792      | B.D.                             | 189      | B.D.                                 | 615      | B.D.                                 | 360      |
| La                                | 1.30                                | 1.02     | 2.25                             | 0.87     | 4.18                                 | 2.32     |                                      | 6.78     |
| Ce                                | 0.66                                | 0.72     | 0.70                             | 0.33     | 0.71                                 | 0.50     | 1.75                                 | 1.81     |
| Nd                                | 0.80                                | 1.15     | 1.17                             | 0.68     | 2.16                                 | 1.63     | 3.56                                 | 4.40     |
| Sm                                | 0.18                                | 0.30     | 0.20                             | 0.13     | 0.39                                 | 0.32     | 0.60                                 | 0.86     |
| Eu                                | 0.04                                | 0.06     | 0.04                             | 0.03     | 0.09                                 | 0.07     | 0.11                                 | 0.15     |
| Gd                                | 0.25                                | 0.40     | 0.26                             | 0.20     | 0.58                                 | 0.50     | 0.76                                 | 1.09     |
| Dy                                | 0.23                                | 0.31     | 0.26                             | 0.19     | 0.61                                 | 0.50     | 0.70                                 | 0.88     |
| Er                                | 0.16                                | 0.20     | 0.18                             | 0.14     | 0.46                                 | 0.40     | 0.47                                 | 0.60     |
| Yb                                | 0.11                                | 0.13     | 0.11                             | 0.08     | 0.40                                 |          | 0.30                                 | 0.36     |
| Lu                                | 0.02                                | 0.02     | 0.02                             | 0.01     | 0.06                                 | 0.05     | 0.05                                 | 0.05     |

B.D.: Below detection limit.

<sup>\*</sup> The values were estimated from dissolved calcite and dolomite amounts in 0.5M-AcA and 0.5M-HCl solution.<sup>\*\*</sup> The dissolved solid amounts were calculated using Ca and Mg concentrations in 0.5M-AcA and 0.5M-HCl solution (see Subsection "Natural dolomitic limestones").
